# Supplementary material for: Inspection of the Lens Thickness With Preoperative Biometric Measurements Prevents an Erroneous Interpretation of Posterior Capsule During FLACS
Source: Research Square preprint supplement (doi:10.21203/rs.3.rs-132979/v1), 2020-12-30
Supplement: Supplementary file 2 [file 6fe712e136ba909c4012c5d5.docx]

Inspection of the lens thickness with preoperative biometric measurements prevents an erroneous interpretation of posterior capsule during FLACS

**Authors :** Mei Kurosawa, MD1), Hiroshi Horiguchi, MD, PhD1), Takuya Shiba, MD, PhD2) and Tadashi Nakano, MD, PhD1)
